# Supplementary material for: Human Salivary Histatin-1 Attenuates Osteoarthritis through Promoting M1/M2 Macrophage Transition
Source: MDPI journal article supplement (doi:10.3390/pharmaceutics15041272), 2023-04-18

## Supplementary Figure S1

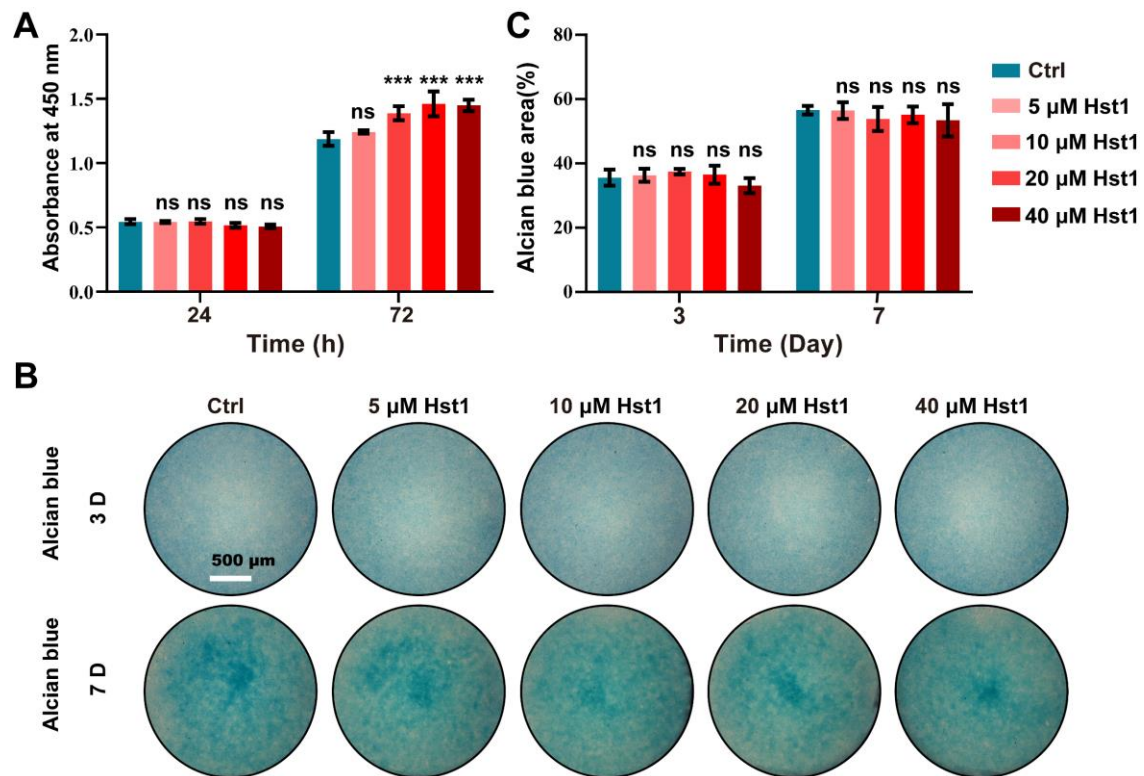

**Supplementary Figure S1.** Effects of Hst1 on metabolic activity and chondrogenic differentiation of ATDC5 cells. (A) CCK8 assay was used to detect the effect of Hst1 on the metabolic activity of ATDC5 cells,  $n=5$ . (B) and (C) After ATDC5 cells were cultured with Hst1 for 3 and 7 days, Alcian blue was used for staining and quantitative analysis,  $n=3$ , scale bar = 500  $\mu$ m. Data are expressed as mean  $\pm$  SD. (\*\*\*:  $p < 0.001$  compare with control group. ns = no significant).

files for review purpose

file S1

Uncropped blot images presented in Figure 4E

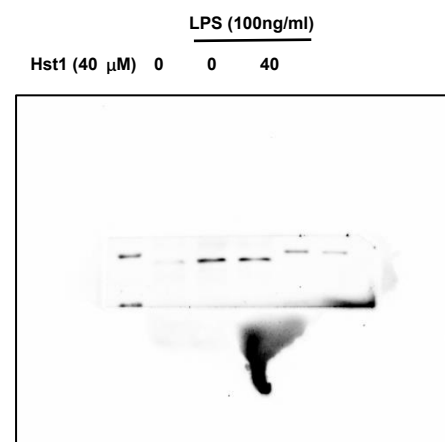

WB (CD86)

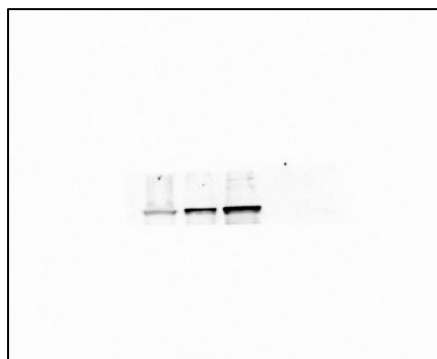

WB (CD206)

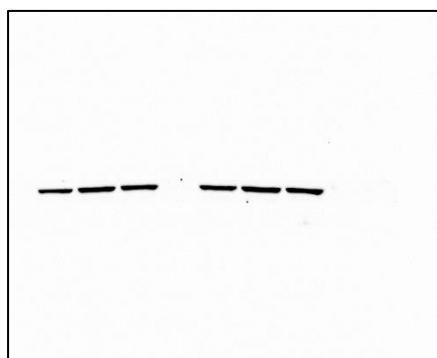

WB ( $\beta$ -actin)

**file S2**

**Uncropped blot images presented in Figure 7A and 7B**

LPS (100ng/ml)  
Hst1 (40  $\mu$ M) 0 0 40

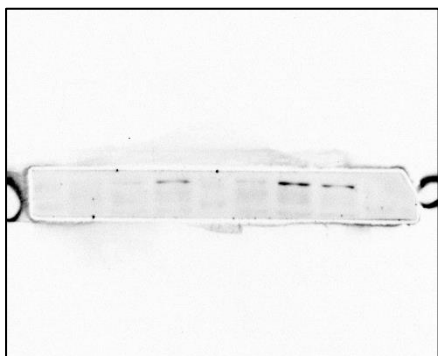

**WB (pNF-κB)**

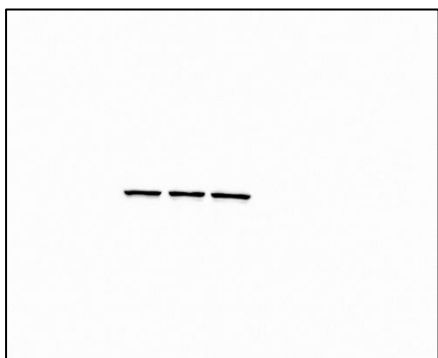

**WB (NF-κB)**

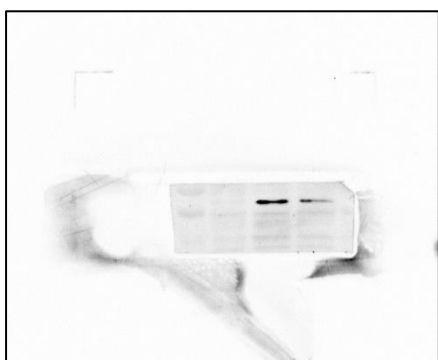

**WB (pIKB-α)**

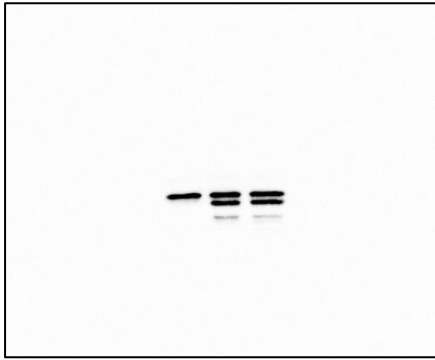

**WB (IKB-α)**

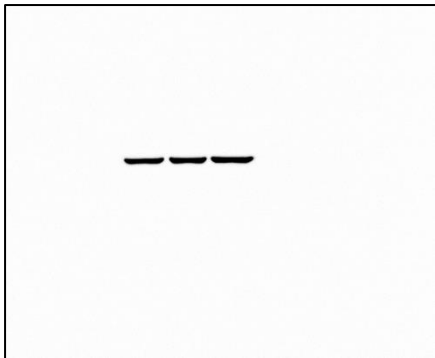

**WB (β-actin)**

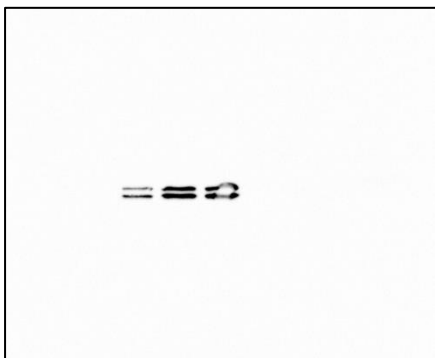

**WB (pERK)**

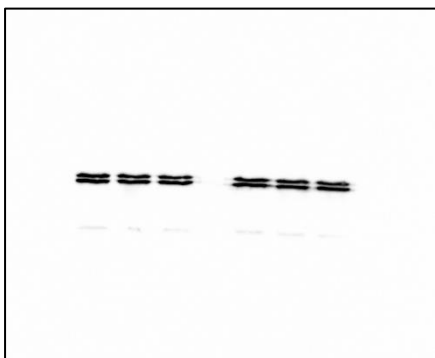

**WB (ERK)**

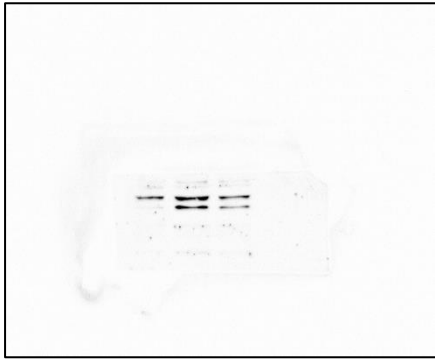

**WB (pJNK)**

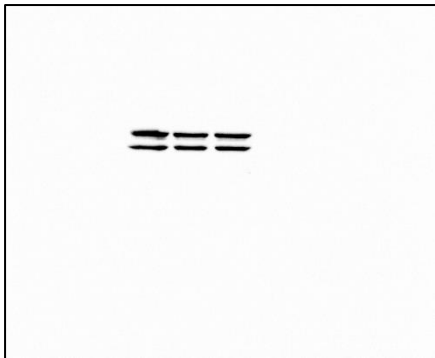

**WB (JNK)**

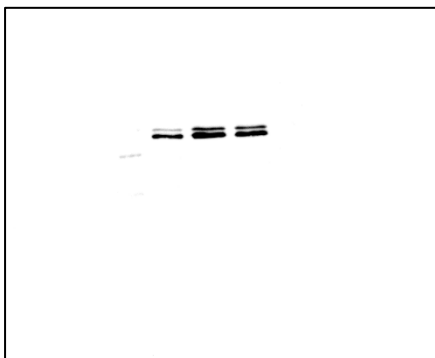

**WB (pP38)**

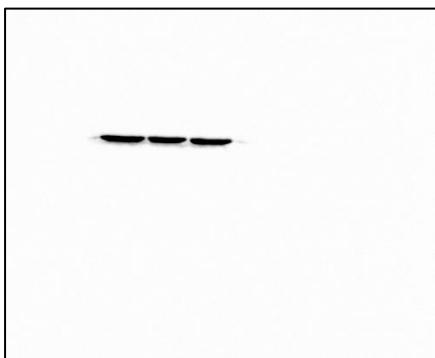

**WB (P38)**

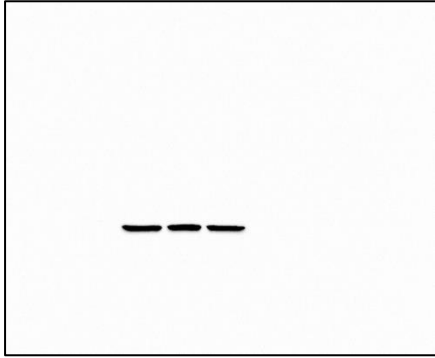

**WB ( $\beta$ -actin)**

**file S3**

**Uncropped blot images presented in Figure 9B and 9C**

Ctrl-CM LPS-CM LPS+Hst1-CM

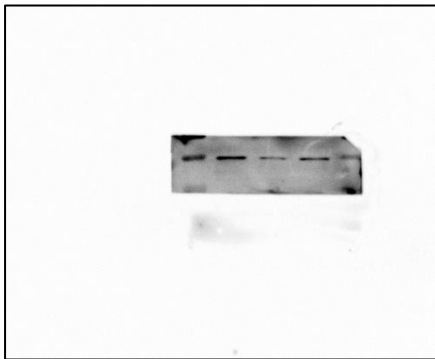

**WB (Col-2)**

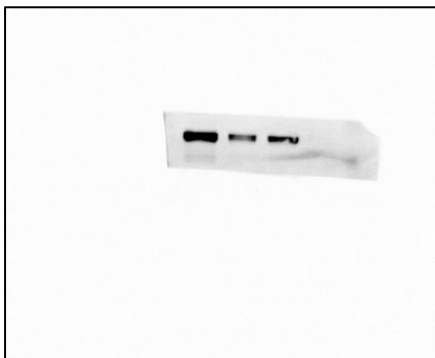

**WB (Sox-9)**

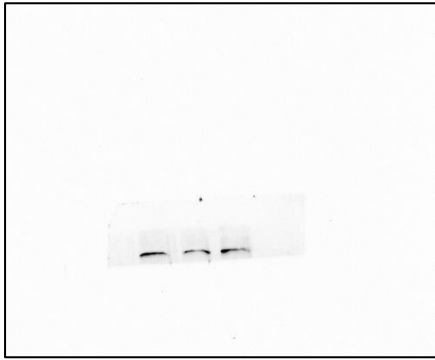

**WB (AggreCAN)**

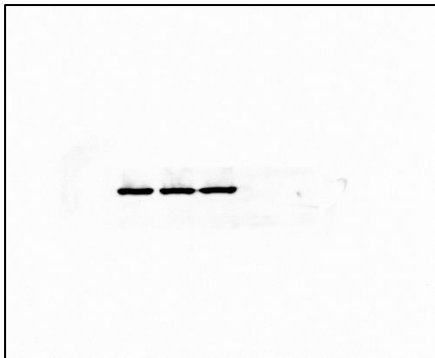

**WB ( $\beta$ -actin)**

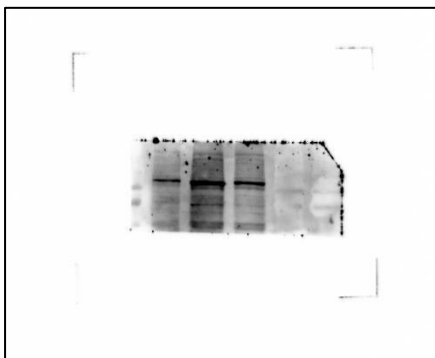

**WB (MMP-2)**

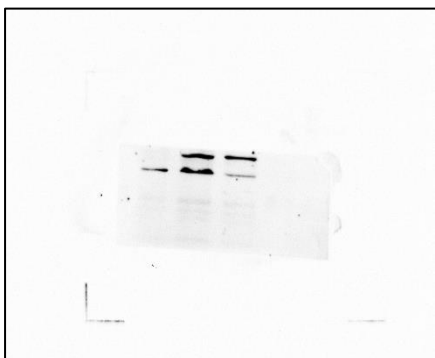

**WB (MMP-3)**

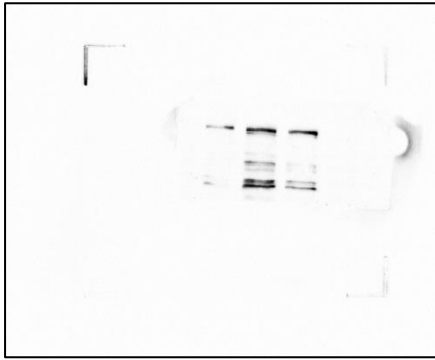

**WB (MMP-9)**

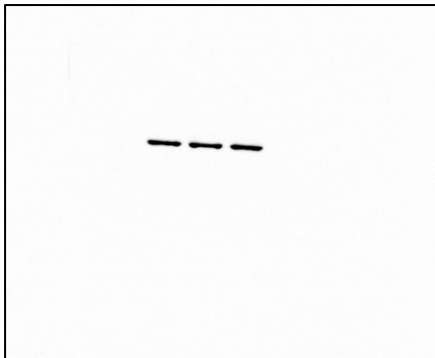

**WB ( $\beta$ -actin)**

**file S4**

**Uncropped blot images presented in Figure 10 D**

Ctrl-CM LPS-CM LPS+Hst1-CM

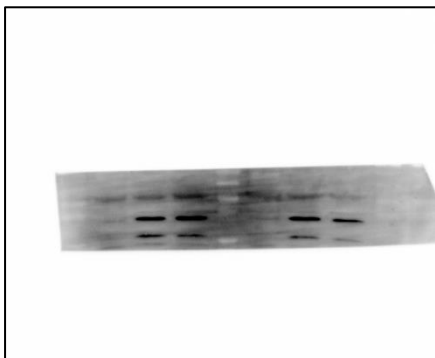

**WB (Clev-Caspase3)**



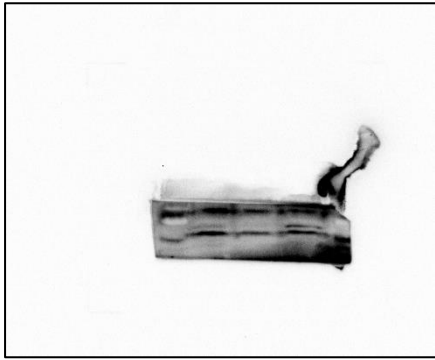

**WB (Bcl-2)**

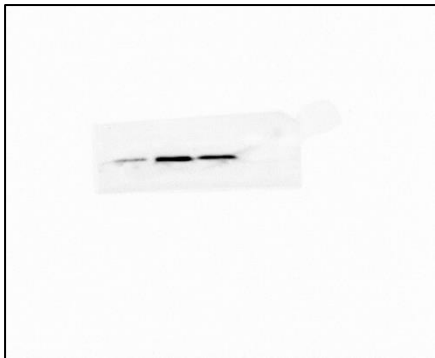

**WB (Bax)**

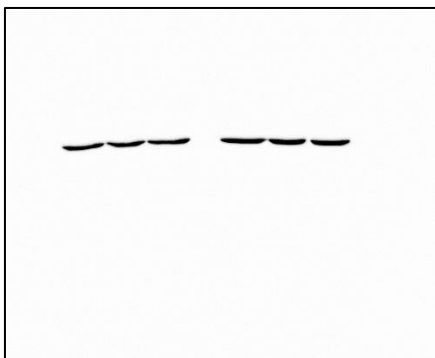

Supplement: s1 [file s1]
